# Supplementary material for: Endovascular treatment for acute ischaemic stroke in routine clinical practice: prospective, observational cohort study (MR CLEAN Registry)
Source: PubMed Central journal article supplement — BMJ. 2018 Mar 9;360:k949. doi: 10.1136/bmj.k949 (PMC5844245; doi:10.1136/bmj.k949), 2018-03-09
Supplement: jani042044.ww1.pdf [file jani042044.ww1.pdf]

## Appendix

**Supplementary Table S1.** Secondary outcomes in the MR CLEAN Registry: comparison with MR CLEAN intervention and control arms. Adjustments were made for age, sex, baseline NIHSS, collateral status and pre-stroke mRS.

|                                                | <b>MR CLEAN Registry vs<br/>MR CLEAN intervention</b> |                         | <b>MR CLEAN Registry vs<br/>MR CLEAN control</b> |                         |
|------------------------------------------------|-------------------------------------------------------|-------------------------|--------------------------------------------------|-------------------------|
|                                                | Unadjusted OR<br>(95% CI)                             | Adjusted OR<br>(95% CI) | Unadjusted OR<br>(95% CI)                        | Adjusted OR<br>(95% CI) |
| <b>mRS 0-1 at 90 days</b>                      | 1.80 (1.18 to 2.74)                                   | 1.92 (1.23 to 3.00)     | 3.69 (2.19 to 6.23)                              | 3.84 (2.23 to 6.61)     |
| <b>mRS 0-2 at 90 days</b>                      | 1.28 (0.96 to 1.72)                                   | 1.63 (1.17 to 2.28)     | 2.63 (1.90 to 3.63)                              | 3.38 (2.336 to 4.84)    |
| <b>mRS 0-3 at 90 days</b>                      | 1.07 (0.81 to 1.41)                                   | 1.44 (1.04 to 1.99)     | 2.02 (1.54 to 2.65)                              | 2.84 (2.07 to 3.90)     |
| <b>Successful Reperfusion<br/>(eTICI 2B-3)</b> | 1.00 (0.74 to 1.36)                                   | 1.02 (0.74 to 1.39)     | NA                                               | NA                      |
|                                                | Beta                                                  | Beta                    | Beta                                             | Beta                    |
| <b>NIHSS after 24-48 hours</b>                 | 2.40 (1.23 to 3.57)                                   | 1.10 (-0.02 to 2.23)    | 5.01 (3.91 to 6.12)                              | 3.28 (2.21 to 4.35)     |

**Supplementary Table S2.** Complications in the MR CLEAN Registry: comparison with MR CLEAN intervention and control arms. Adjustments were made for age, sex, baseline NIHSS, collateral status and pre-stroke mRS.

|                                             | <b>MR CLEAN Registry vs</b>  |                         | <b>MR CLEAN Registry vs</b> |                         |
|---------------------------------------------|------------------------------|-------------------------|-----------------------------|-------------------------|
|                                             | <b>MR CLEAN intervention</b> |                         | <b>MR CLEAN control</b>     |                         |
|                                             | Unadjusted OR<br>(95% CI)    | Adjusted OR<br>(95% CI) | Unadjusted OR<br>(95% CI)   | Adjusted OR<br>(95% CI) |
| <b>Mortality within 7 days</b>              | 1.03 (0.70 to 1.54)          | 0.89 (0.58 to 1.37)     | 1.52 (0.99 to 2.32)         | 1.51 (0.95 to 2.38)     |
| <b>Mortality within 30 days</b>             | 1.32 (0.93 to 1.88)          | 1.07 (0.72 to 1.58)     | 1.37 (0.98 to 1.91)         | 1.21 (0.83 to 1.77)     |
| <b>Mortality within 90 days</b>             | 1.49 (1.06 to 2.08)          | 1.22 (0.83 to 1.78)     | 1.39 (1.02 to 1.90)         | 1.22 (0.86 to 1.75)     |
| <b>Symptomatic intracranial haemorrhage</b> | 0.73 (0.43 to 1.24)          | 0.71 (0.41 to 1.24)     | 0.90 (0.53 to 1.54)         | 0.82 (0.47 to 1.42)     |
| <b>Hemicraniectomy</b>                      | 0.39 (0.21 to 0.74)          | 0.55 (0.28 to 1.08)     | 0.49 (0.26 to 0.94)         | 0.65 (0.33 to 1.30)     |
| <b>Progression of ischaemic stroke</b>      | 0.42 (0.29 to 0.61)          | 0.37 (0.25 to 0.54)     | 0.47 (0.33 to 0.67)         | 0.40 (0.28 to 0.59)     |
| <b>Pneumonia</b>                            | 1.07 (0.70 to 1.64)          | 0.93 (0.60 to 1.54)     | 0.73 (0.51 to 1.05)         | 0.65 (0.44 to 0.95)     |
| <b>Other infection</b>                      | 0.72 (0.41 to 1.26)          | 0.68 (0.38 to 1.21)     | 1.36 (0.69 to 2.66)         | 1.31 (0.66 to 2.61)     |
| <b>Cardiac ischaemia</b>                    | 1.89 (0.24 to 14.57)         | 1.36 (0.17 to 10.83)    | 0.53 (0.17 to 1.67)         | 0.40 (0.12 to 1.34)     |
| <b>Extracranial haemorrhage</b>             | *                            | *                       | 3.00 (0.72 to 12.60)        | 2.39 (0.56 to 10.18)    |
| <b>Allergic reaction</b>                    | 1.57 (0.30 to 12.32)         | 1.52 (0.19 to 12.26)    | *                           | *                       |
| <b>Other complications</b>                  | 1.17 (0.77 to 1.79)          | 1.16 (0.76 to 1.78)     | 1.01 (0.69 to 1.47)         | 1.01 (0.69 to 1.50)     |

\*Too few events

**Supplementary Table S3.** Primary and secondary outcomes in the MR CLEAN Registry of non-imputed data (n=1363): comparison with MR CLEAN intervention and control arms. Adjustments were made for age, sex, baseline NIHSS, collateral status and pre-stroke mRS.

|                                                | <b>MR CLEAN Registry vs<br/>MR CLEAN intervention</b> |                         | <b>MR CLEAN Registry vs<br/>MR CLEAN control</b> |                         |
|------------------------------------------------|-------------------------------------------------------|-------------------------|--------------------------------------------------|-------------------------|
|                                                | Unadjusted OR<br>(95% CI)                             | Adjusted OR<br>(95% CI) | Unadjusted OR<br>(95% CI)                        | Adjusted OR<br>(95% CI) |
| <b>mRS at 90 days</b>                          | 1.02 (0.80 to 1.29)                                   | 1.31 (1.02 to 1.68)     | 1.47 (1.18 to 1.83)                              | 1.90 (1.50 to 2.41)     |
| <b>mRS 0-1 at 90 days</b>                      | 1.78 (1.17 to 2.72)                                   | 1.93 (1.23 to 3.01)     | 3.66 (2.17 to 6.18)                              | 3.87 (2.25 to 6.65)     |
| <b>mRS 0-2 at 90 days</b>                      | 1.26 (0.94 to 1.70)                                   | 1.63 (1.17 to 2.28)     | 2.59 (1.87 to 3.60)                              | 3.48 (2.43 to 5.00)     |
| <b>Successful Reperfusion<br/>(eTICI 2B-3)</b> | 0.95 (0.70 to 1.29)                                   | 0.98 (0.72 to 1.34)     | NA                                               | NA                      |
|                                                | Beta                                                  | Beta                    | Beta                                             | Beta                    |
| <b>NIHSS after 24-48 hours</b>                 | 2.32 (1.12 to 3.51)                                   | 1.02 (-0.13 to 2.17)    | 4.93 (3.80 to 6.05)                              | 3.19 (2.10 to 4.28)     |

**Supplementary Table S4.** Primary outcome in the MR CLEAN Registry (n=1488): comparison with MR CLEAN intervention and control arms. Adjustments were made for age, sex, baseline NIHSS, collateral status, pre-stroke mRS, IV alteplase treatment and systolic blood pressure.

|                       | <b>MR CLEAN Registry vs<br/>MR CLEAN intervention</b> | <b>MR CLEAN Registry vs<br/>MR CLEAN control</b> |
|-----------------------|-------------------------------------------------------|--------------------------------------------------|
|                       | Adjusted OR (95% CI)                                  | Adjusted OR (95% CI)                             |
| <b>mRS at 90 days</b> | 1.30 (1.02 to 1.67)                                   | 1.85 (1.46 to 2.34)                              |

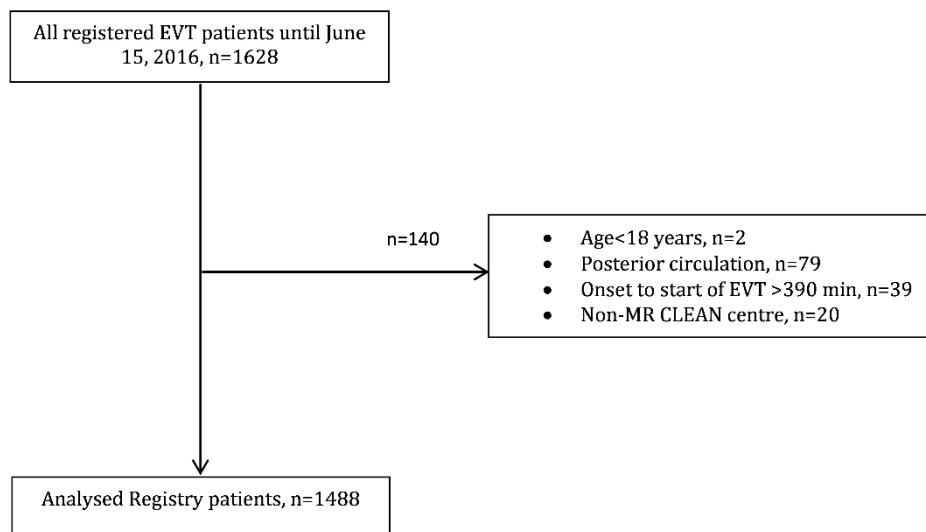

**Figure S1.** Flowchart of MR CLEAN Registry patients selected for core analysis.

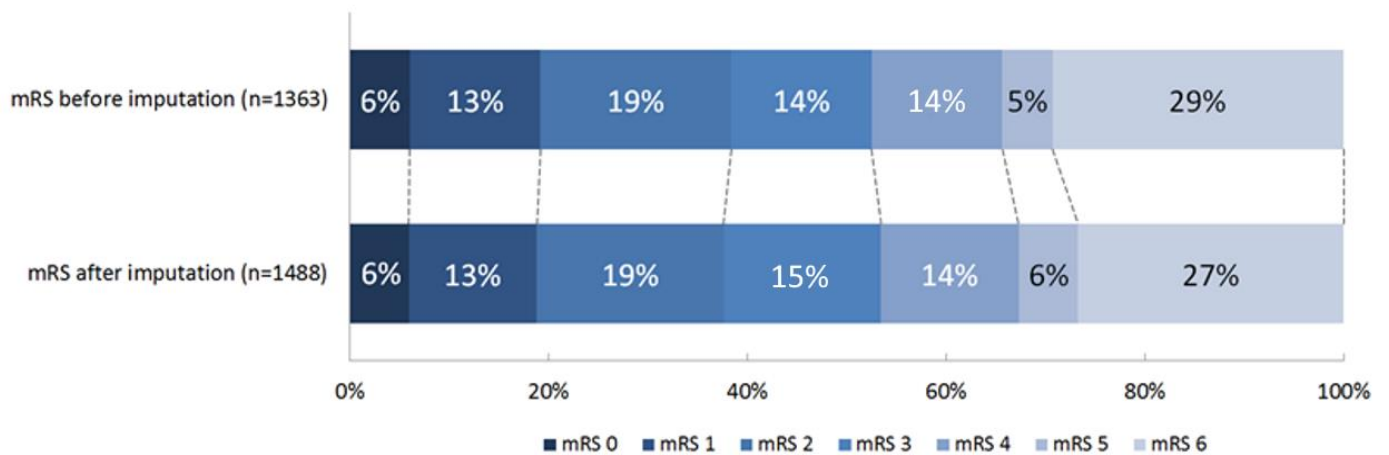

**Figure S2.** Modified Rankin scale score (mRS) before multiple imputation compared to the mRS after multiple imputation. Any mRS score of 0 to 5 assessed within 30 days was treated as missing and replaced by multiple imputation.
