# Supplementary material for: Endovascular treatment for acute ischaemic stroke in routine clinical practice: prospective, observational cohort study (MR CLEAN Registry)
Source: PubMed Central journal article supplement — BMJ. 2018 Mar 9;360:k949. doi: 10.1136/bmj.k949 (PMC5844245; doi:10.1136/bmj.k949), 2018-03-09
Supplement: jani042044.ww2.pdf [file jani042044.ww2.pdf]

Ivo G H Jansen, medical researcher,[1] Maxim J H L Mulder, medical researcher,[3,4] Robert-Jan B Goldhoorn, medical researcher,[5] Bart J Emmer, interventional radiologist,[1,4] Adriaan C G M van Es, interventional radiologist,[4] Bob Roozenbeek, neurologist,[3] Wouter J Schonewille, neurologist,[7] René van den Berg, interventional radiologist,[1] Jonathan M Coutinho, neurologist,[2] Julie Staals, neurologist,[5] Alida A Postma, interventional radiologist,[6] Geert J Lycklama à Nijeholt, interventional radiologist,[13] Jeannette Hofmeijer, neurologist,[11] Jasper M Martens, interventional radiologist,[12] Heleen M den Hertog, neurologist,[34] Emiel J C Sturm, interventional radiologist,[35] H Bart van der Worp, neurologist,[17] Rob H Lo, interventional radiologist,[18] Roel J J Heijboer, interventional radiologist,[31] Koos Keizer, neurologist,[32] Maarten Uyttenboogaart, interventional neurologist,[28] Omid Eshghi, interventional radiologist,[29] Marieke J H Wermer, neurologist,[9] Marianne A A van Walderveen, interventional radiologist,[10] Ewoud J van Dijk, neurologist,[19] Hieronymus D Boogaarts, interventional radiologist,[20] Sebastiaan F de Bruijn, neurologist,[15] Lukas C van Dijk, interventional radiologist,[16] Jan S P van den Berg, neurologist,[22] Boudewijn A A M van Hasselt, interventional radiologist,[23] Paul L M de Kort, neurologist,[21] Jo P P Peluso, interventional radiologist,[26] Tobien H C M L Schreuder, neurologist,[30] Leo A M Aerden, neurologist,[24] René J Dallinga, interventional radiologist,[25] Marieke E S Sprengers, interventional radiologist,[1] Lonneke S F Yo, interventional radiologist,[33] Sjoerd F M Jenniskens, interventional radiologist,[27] Stefan D Roosendaal, interventional radiologist,[1] Bas F W van der Kallen, interventional radiologist,[13] Ido R van den Wijngaard, interventional neurologist,[13] Joost C J Bot, interventional radiologist,[36] Pieter J van Doormaal, interventional radiologist,[4] H Zwenneke Flach, interventional radiologist,[23] Esmee Venema, medical researcher,[3,38] Hester F Lingsma, senior medical statistician,[38] Ludo F M Beenen, radiologist,[1] Albert J Yoo, interventional radiologist,[37] Jelis Boiten, neurologist,[14] Jan A Vos, interventional radiologist,[8] Yvo B W E M Roos, professor of acute neurology,[2] Robert J van Oostenbrugge, professor of vascular neurology,[5] Aad van der Lugt, professor of neuroradiology and head/neck radiology,[4] Wim H van Zwam, interventional radiologist,[6] Diederik W J Dippel, professor of neurovascular diseases,[3] Charles B L M Majoie, professor of neuroradiology,[1] for the MR CLEAN Registry investigators.

[1] Department of Radiology, Academic Medical Centre, Amsterdam, Netherlands

[2] Department of Neurology, Academic Medical Centre, Amsterdam, Netherlands

[3] Department of Neurology, Erasmus MC University Medical Centre, Rotterdam, Netherlands

[4] Department of Radiology, Erasmus MC University Medical Centre, Rotterdam, Netherlands

[5] Department of Neurology, Maastricht University Medical Centre and Cardiovascular Research Institute Maastricht (CARIM), Maastricht, Netherlands

[6] Department of Radiology, Maastricht University Medical Centre and Cardiovascular Research Institute Maastricht (CARIM), Maastricht, Netherlands

[7] Department of Neurology, Sint Antonius Hospital, Nieuwegein, Netherlands

[8] Department of Radiology, Sint Antonius Hospital, Nieuwegein, Netherlands

[9] Department of Neurology, Leiden University Medical Centre, Leiden, Netherlands

[10] Department of Radiology, Leiden University Medical Centre, Leiden, Netherlands

- [11] Department of Neurology, Rijnstate Hospital, Arnhem, Netherlands
- [12] Department of Radiology, Rijnstate Hospital, Arnhem, Netherlands
- [13] Department of Radiology, Haaglanden Medical Centre, The Hague, Netherlands
- [14] Department of Neurology, Haaglanden Medical Centre, The Hague, Netherlands
- [15] Department of Neurology, Haga Hospital, The Hague, Netherlands
- [16] Department of Radiology, Haga Hospital, The Hague, Netherlands
- [17] Department of Neurology, University Medical Centre Utrecht, Utrecht, Netherlands
- [18] Department of Radiology, University Medical Centre Utrecht, Utrecht, Netherlands
- [19] Department of Neurology, Radboud University Medical Centre, Nijmegen, Netherlands
- [20] Department of Neurosurgery, Radboud University Medical Centre, Nijmegen, Netherlands
- [21] Department of Neurology, Sint Elisabeth Hospital, Tilburg, Netherlands
- [22] Department of Neurology, Isala Klinieken, Zwolle, Netherlands
- [23] Department of Radiology, Isala Klinieken, Zwolle, Netherlands
- [24] Department of Neurology, Reinier de Graaf Gasthuis, Delft, Netherlands
- [25] Department of Radiology, Reinier de Graaf Gasthuis, Delft, Netherlands
- [26] Department of Radiology, Sint Elisabeth Hospital, Tilburg, Netherlands
- [27] Department of Radiology, Radboud University Medical Centre, Nijmegen, Netherlands
- [28] Department of Neurology, University Medical Centre Groningen, Groningen, Netherlands
- [29] Department of Radiology, University Medical Centre Groningen, Groningen, Netherlands
- [30] Department of Neurology, Atrium Medical Centre, Heerlen, Netherlands
- [31] Department of Radiology, Atrium Medical Centre, Heerlen, Netherlands
- [32] Department of Neurology, Catharina Hospital, Eindhoven, Netherlands
- [33] Department of Radiology, Catharina Hospital, Eindhoven, Netherlands
- [34] Department of Neurology, Medisch Spectrum Twente, Enschede, Netherlands
- [35] Department of Radiology, Medisch Spectrum Twente, Enschede, Netherlands
- [36] Department of Radiology, VU Medical Centre, Amsterdam, Netherlands
- [37] Department of Radiology, Texas Stroke Institute, Plano, TX, USA
- [38] Department of Public Health, Erasmus MC University Medical Centre, Rotterdam, Netherlands
